# Supplementary material
Source: publisher site journal article supplement (https://www.spandidos-publications.com/3734/downloadSupplementary)

Figure S1. MCODE model of the differentially expressed genes.

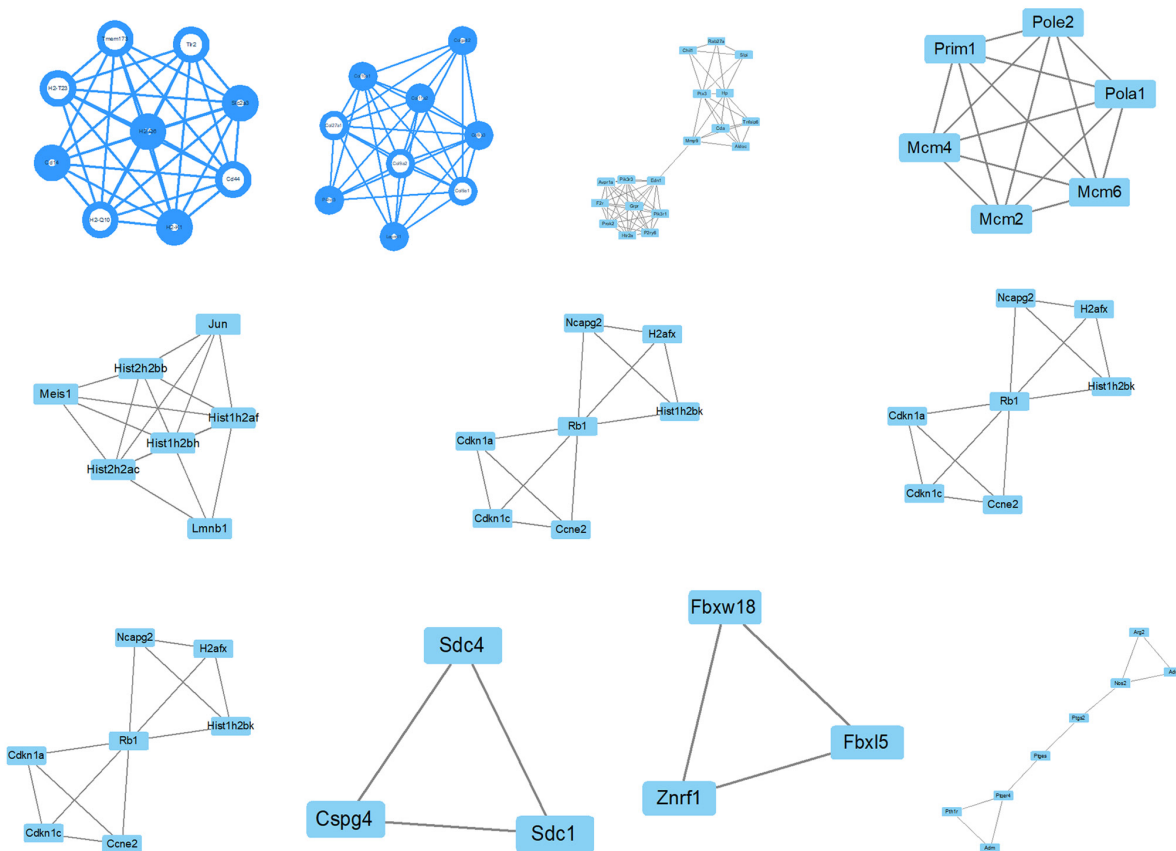

Supplement: Supplementary file 1 [file downloadSupplementary]
